# Supplementary material for: Microalgae-derived Co3O4 nanomaterials for catalytic CO oxidation
Source: PubMed Central journal article supplement (PMC10839636; doi:10.1039/d4ra00343h), 2024-02-05
Supplement: RA-014-D4RA00343H-s001.pdf [file RA-014-D4RA00343H-s001.pdf]

## Supplementary information

### Microalgae-derived $\text{Co}_3\text{O}_4$ nanomaterials for catalytic CO oxidation

Agnieszka Sidorowicz,<sup>a</sup> Nevzat Yigit,<sup>b</sup> Thomas Wicht,<sup>b</sup> Michael Stöger-Pollach,<sup>c</sup> Alessandro Concas,<sup>a</sup> Roberto Orrù,<sup>a</sup> Giacomo Cao,<sup>a,\*</sup> and Günther Rupprechter<sup>b,\*</sup>

<sup>a</sup>Interdepartmental Centre of Environmental Engineering and Sciences, University of Cagliari, 09123 Cagliari, Italy

<sup>b</sup>Institute of Materials Chemistry, TU Wien, Getreidemarkt 9/ BC, 1060 Vienna, Austria

<sup>c</sup>University Service Center for Transmission Electron Microscopy, TU Wien, Wiedner Hauptstr. 8-10, 1040 Vienna, Austria

## Table of contents

|                                                                                                                                                                                                                |    |
|----------------------------------------------------------------------------------------------------------------------------------------------------------------------------------------------------------------|----|
| <b>Table S1</b> Used media composition for <i>Spirulina platensis</i> cultivation. ....                                                                                                                        | 3  |
| <b>Table S2</b> Used media composition for <i>Chlorella vulgaris</i> cultivation. ....                                                                                                                         | 4  |
| <b>Table S3</b> Used media composition for <i>Haematococcus pluvialis</i> cultivation. ....                                                                                                                    | 4  |
| <b>Figure S1</b> Experimental set-up (A) ATR-FTIR, (B) DSC, (C) CO oxidation, (D) DRIFTS. ....                                                                                                                 | 5  |
| <b>Figure S2</b> Optical microscopy images of the used microalgae (A) <i>Spirulina platensis</i> , (B) <i>Chlorella vulgaris</i> , (C) <i>Haematococcus pluvialis</i> . ....                                   | 5  |
| <b>Table S4</b> Elemental analysis of the used microalgae extract. ....                                                                                                                                        | 5  |
| <b>Table S5</b> FTIR values of <i>Spirulina platensis</i> extract. ....                                                                                                                                        | 6  |
| <b>Table S6</b> FTIR values of <i>Chlorella vulgaris</i> extract. ....                                                                                                                                         | 7  |
| <b>Table S7</b> FTIR values of <i>Haematococcus pluvialis</i> extract. ....                                                                                                                                    | 8  |
| <b>Figure S3</b> XRD analysis of $\text{Co}_3\text{O}_4$ NMs: (A) wide angle, (B) selected magnified angle regions. ....                                                                                       | 9  |
| <b>Table S8</b> D-spacing values of SA400 $\text{Co}_3\text{O}_4$ NMs. ....                                                                                                                                    | 9  |
| <b>Table S9</b> D-spacing values for SP450, SP650, and SP800 $\text{Co}_3\text{O}_4$ NMs. ....                                                                                                                 | 10 |
| <b>Table S10</b> D-spacing values for CH450, CH650, and CH800 $\text{Co}_3\text{O}_4$ NMs. ....                                                                                                                | 10 |
| <b>Table S11</b> D-spacing values for HA450, HA650, and HA800 $\text{Co}_3\text{O}_4$ NMs. ....                                                                                                                | 11 |
| <b>Figure S4</b> Influence of calcination temperature (A) crystallite size, (B) lattice parameter and volume, (C) surface area. ....                                                                           | 11 |
| <b>Figure S5</b> BET isotherms for commercial and synthesized $\text{Co}_3\text{O}_4$ NMs. ....                                                                                                                | 12 |
| <b>Figure S6</b> TEM and SAED studies of $\text{Co}_3\text{O}_4$ NMs: (A-B) SA400, (C-D) SP450, (E-F) CH450, (G-H) HA450. ....                                                                                 | 12 |
| <b>Figure S7</b> EELS spectra of the commercial and synthesized $\text{Co}_3\text{O}_4$ NMs (A) SA, (B) SP450, (C) CH450, (D) HA450. ....                                                                      | 13 |
| <b>Figure S8</b> UATR-FTIR spectra of $\text{Co}_3\text{O}_4$ NMs. ....                                                                                                                                        | 13 |
| <b>Figure S9</b> $\text{H}_2$ -TPR of $\text{Co}_3\text{O}_4$ NMs (A) SP400, (B) SP450, SP650, SP800, (C) CH450, CH650, CH800, (D) HA450, HA650, HA800. ....                                                   | 14 |
| <b>Table S12</b> Detected peaks in $\text{H}_2$ -TPR and $\text{O}_2$ -TPD ( $^\circ\text{C}$ ) for $\text{Co}_3\text{O}_4$ NMs. ....                                                                          | 14 |
| <b>Table S13</b> DSC activation energy values (J/g) for SA, SP450, CH450, and HA450 $\text{Co}_3\text{O}_4$ NMs. ....                                                                                          | 15 |
| <b>Figure S10</b> DSC measurements for SA400 $\text{Co}_3\text{O}_4$ NMs. ....                                                                                                                                 | 15 |
| <b>Table S14</b> DCS activation energy values (J/g) for SA400 $\text{Co}_3\text{O}_4$ NMs. ....                                                                                                                | 16 |
| <b>Figure S11</b> CO oxidation activity comparison between $\text{Co}_3\text{O}_4$ NMs calcined at different temperatures: (A) SP450, CH450, HA450, (B) SP650, CH650, HA650, (C) SP800, CH800, HA800. ....     | 16 |
| <b>Figure S12</b> CO oxidation activity decrease with time of $\text{Co}_3\text{O}_4$ NMs: (A), SA400, (B) SP, (C) CH, (D) HA. ....                                                                            | 17 |
| <b>Figure S13</b> Tauc plots for commercial and synthesized $\text{Co}_3\text{O}_4$ NMs. ....                                                                                                                  | 17 |
| <b>Table S15</b> Bandgap values of $\text{Co}_3\text{O}_4$ NMs. ....                                                                                                                                           | 19 |
| <b>Figure S14</b> DRIFTS spectra of SA400, SP450, CH450, and HA450 (A) CO oxidation activity over time (carbonate formation), (B) CO oxidation activity upon heating (carbonate stability). ....               | 19 |
| <b>Figure S15</b> DRIFTS spectra of SP650, SP800, CH650, CH800, HA450, and HA800 (A) CO oxidation activity over time (carbonate formation), (B) CO oxidation activity upon heating (carbonate stability). .... | 20 |

**Table S1** Used media composition for *Spirulina platensis* cultivation.

| Components in Modified Zarrouk Medium                                               | Concentration (mg/L) |
|-------------------------------------------------------------------------------------|----------------------|
| NaHCO <sub>3</sub>                                                                  | 7000.0               |
| NaNO <sub>3</sub>                                                                   | 3000.0               |
| K <sub>2</sub> HPO <sub>4</sub>                                                     | 800.0                |
| K <sub>2</sub> SO <sub>4</sub>                                                      | 400.0                |
| MgSO <sub>4</sub>                                                                   | 240.0                |
| CaCl <sub>2</sub> ·2 H <sub>2</sub> O                                               | 40.0                 |
| NaCl                                                                                | 1000.0               |
| Na-EDTA·2 H <sub>2</sub> O                                                          | 100.0                |
| KOH                                                                                 | 1000.0               |
| FeSO <sub>4</sub> ·7 H <sub>2</sub> O                                               | 10.0                 |
| EDTA                                                                                | 0.05000              |
| H <sub>3</sub> BO <sub>3</sub>                                                      | 0.01140              |
| ZnSO <sub>4</sub> ·7 H <sub>2</sub> O                                               | 0.02200              |
| MnCl <sub>2</sub> ·4 H <sub>2</sub> O                                               | 0.00506              |
| CoCl <sub>2</sub> ·6 H <sub>2</sub> O                                               | 0.00161              |
| CuSO <sub>4</sub> ·5 H <sub>2</sub> O                                               | 0.00157              |
| (NH <sub>4</sub> ) <sub>6</sub> Mo <sub>7</sub> O <sub>24</sub> ·4 H <sub>2</sub> O | 0.00110              |

**Table S2** Used media composition for *Chlorella vulgaris* cultivation.

| Components in BBM Medium                                                      | Concentration (mg/L) |
|-------------------------------------------------------------------------------|----------------------|
| NaNO <sub>3</sub>                                                             | 250.0                |
| K <sub>2</sub> HPO <sub>4</sub>                                               | 75.0                 |
| KH <sub>2</sub> PO <sub>4</sub>                                               | 175.0                |
| MgSO <sub>4</sub> ·7 H <sub>2</sub> O                                         | 75.0                 |
| CaCl <sub>2</sub> ·2 H <sub>2</sub> O                                         | 25.0                 |
| NaCl                                                                          | 25.0                 |
| EDTA                                                                          | 63.6                 |
| KOH                                                                           | 31.0                 |
| FeSO <sub>4</sub> ·7 H <sub>2</sub> O in H <sub>2</sub> SO <sub>4</sub> (10%) | 5.0                  |
| ZnSO <sub>4</sub> ·7 H <sub>2</sub> O                                         | 8.82                 |
| CuSO <sub>4</sub> ·5 H <sub>2</sub> O                                         | 1.57                 |
| MnCl <sub>2</sub> ·4 H <sub>2</sub> O                                         | 1.44                 |
| MoO <sub>3</sub>                                                              | 0.71                 |
| Co(NO <sub>3</sub> ) <sub>2</sub> ·6 H <sub>2</sub> O                         | 0.49                 |

**Table S3** Used media composition for *Haematococcus pluvialis* cultivation.

| Components in Modified OHM Medium                                                   | Concentration (mg/L) |
|-------------------------------------------------------------------------------------|----------------------|
| KNO <sub>3</sub>                                                                    | 410.0                |
| K <sub>2</sub> HPO <sub>4</sub>                                                     | 30.0                 |
| MgSO <sub>4</sub> ·7 H <sub>2</sub> O                                               | 246.5                |
| CaCl <sub>2</sub> ·2 H <sub>2</sub> O                                               | 111.0                |
| FeSO <sub>4</sub> ·7 H <sub>2</sub> O                                               | 3.0                  |
| MnCl <sub>2</sub> ·4 H <sub>2</sub> O                                               | 0.989                |
| (NH <sub>4</sub> ) <sub>6</sub> Mo <sub>7</sub> O <sub>24</sub> ·4 H <sub>2</sub> O | 0.120                |
| CuSO <sub>4</sub> ·5 H <sub>2</sub> O                                               | 0.012                |
| CoCl <sub>2</sub> ·6 H <sub>2</sub> O                                               | 0.011                |
| Se                                                                                  | 0.005                |

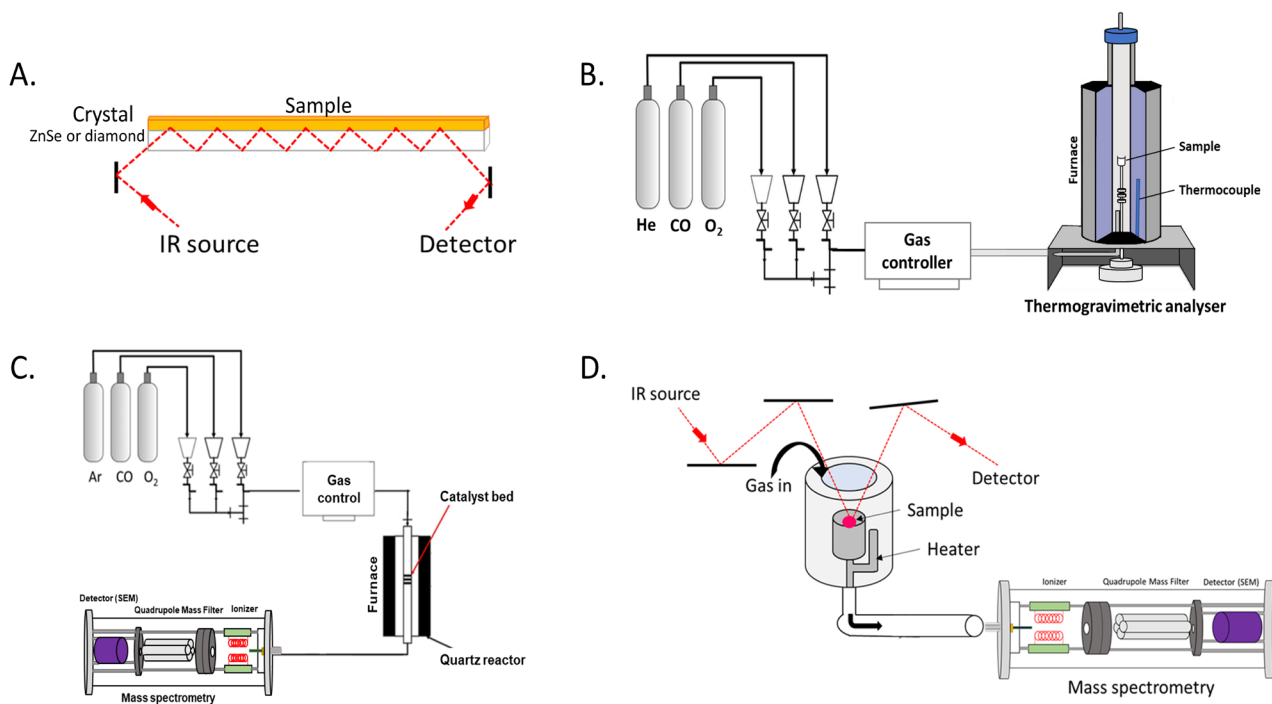

**Figure S1** Experimental set-up (A) ATR-FTIR, (B) DSC, (C) CO oxidation, (D) DRIFTS.

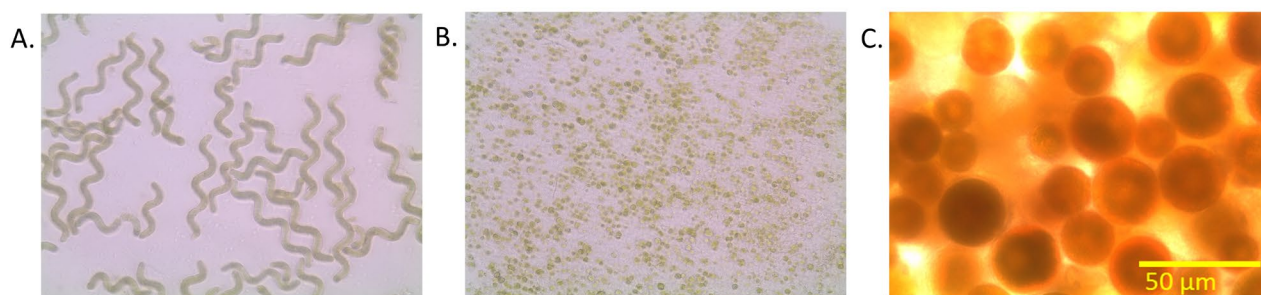

**Figure S2** Optical microscopy images of the used microalgae: (A) *Spirulina platensis*, (B) *Chlorella vulgaris*, (C) *Haematococcus pluvialis*.

**Table S4** Elemental analysis of the used microalgae extract.

|                                | Phosphorous content (mg/L) | Potassium content (mg/L) |
|--------------------------------|----------------------------|--------------------------|
| <i>Spirulina platensis</i>     | 1.070                      | 100.0                    |
| <i>Chlorella vulgaris</i>      | 1.595                      | 90.0                     |
| <i>Haematococcus pluvialis</i> | 0.405                      | 19.5                     |

**Table S5** FTIR values of *Spirulina platensis* extract.

| <i>Spirulina platensis</i> <sup>1-3</sup> |                                     |                                                                                                         |
|-------------------------------------------|-------------------------------------|---------------------------------------------------------------------------------------------------------|
| Wavenumber                                | Functional group                    | Characteristics                                                                                         |
| 3778, 3433, 3246, 3199                    | O-H and N-H                         | OH stretching vibrations of polysaccharides, proteins and water<br>NH stretching vibrations of proteins |
| 2972                                      | CH <sub>3</sub>                     | Asymmetric stretching vibrations of C-H in CH <sub>3</sub> group                                        |
| 2945                                      | CH <sub>2</sub>                     | Asymmetric stretching vibrations of C-H in CH <sub>2</sub> group                                        |
| 2887                                      | CH <sub>3</sub>                     | Symmetric stretching vibrations of C-H in CH <sub>3</sub> group                                         |
| 2781                                      | C-H                                 | Stretching vibrations of cyclic aliphatic hydrocarbons                                                  |
| 2575, 2395, 2110                          | C=C and C≡C                         | Stretching vibrations of conjugated systems                                                             |
| 1652, 1641                                | C=O                                 | Amide I band                                                                                            |
| 1448, 1383                                | CH <sub>3</sub> and CH <sub>2</sub> | C-H bending vibrations of lipids                                                                        |
| 1408                                      | CH <sub>3</sub> and CH <sub>2</sub> | C-H bending vibrations                                                                                  |
| 1350, 1325                                | C-N                                 | Amide III band                                                                                          |
| 1292                                      | C-N                                 | Stretching vibrations of CO-NH                                                                          |
| 1190                                      | C-O                                 | Stretching vibrations of C-O-C in polysaccharides                                                       |
| 1086                                      | C-O and PO <sup>2-</sup>            | Stretching vibrations in carbohydrates and stretching vibrations of phosphate group                     |
| 1048, 1039                                | C-O                                 | Stretching vibrations of C-O-C of carbohydrates                                                         |
| 1009                                      | CH <sub>2</sub>                     | Stretching vibrations of C-C, bending vibrations of a ring, rocking vibrations of CH <sub>2</sub>       |

**Table S6** FTIR values of *Chlorella vulgaris* extract.

| <i>Chlorella vulgaris</i> <sup>2,3</sup> |                                     |                                                                                                         |
|------------------------------------------|-------------------------------------|---------------------------------------------------------------------------------------------------------|
| Wavenumber                               | Functional group                    | Characteristics                                                                                         |
| 3295, 3232                               | O-H and N-H                         | OH stretching vibrations of polysaccharides, proteins and water<br>NH stretching vibrations of proteins |
| 2966                                     | CH <sub>3</sub>                     | Asymmetric stretching vibrations of C-H in CH <sub>3</sub> group                                        |
| 2926                                     | CH <sub>2</sub>                     | Asymmetric stretching vibrations of C-H in CH <sub>2</sub> group of lipids and carbohydrates            |
| 2883, 2835                               | CH <sub>3</sub>                     | Symmetric stretching vibrations of C-H in CH <sub>3</sub> group                                         |
| 1929                                     | C=O or C=C                          | Bending vibrations                                                                                      |
| 1452, 1383                               | CH <sub>3</sub> and CH <sub>2</sub> | C-H bending vibrations of lipids                                                                        |
| 1326, 1270                               | C-N                                 | Amide III band                                                                                          |
| 1088                                     | C-O and PO <sup>2-</sup>            | Stretching vibrations in carbohydrates and stretching vibrations of phosphate group                     |
| 1028                                     | C-O                                 | Stretching vibrations of C-O-C of carbohydrates                                                         |

**Table S7** FTIR values of *Haematococcus pluvialis* extract.

---

*Haematococcus pluvialis*<sup>2,3</sup>

---

| Wavenumber       | Functional group                    | Characteristics                                                                                         |
|------------------|-------------------------------------|---------------------------------------------------------------------------------------------------------|
| 3273, 3234       | O-H and N-H                         | OH stretching vibrations of polysaccharides, proteins and water<br>NH stretching vibrations of proteins |
| 2972             | CH <sub>3</sub>                     | Asymmetric stretching vibrations of C-H in CH <sub>3</sub> group                                        |
| 2889             | CH <sub>3</sub>                     | Symmetric stretching vibrations of C-H in CH <sub>3</sub> group                                         |
| 1927             | C=O or C=C                          | Bending vibrations                                                                                      |
| 1645             | C=O                                 | Amide I band                                                                                            |
| 1448, 1414, 1383 | CH <sub>3</sub> and CH <sub>2</sub> | C-H bending vibrations of lipids                                                                        |
| 1327, 1275       | C-N                                 | Amide III band                                                                                          |
| 1088             | C-O and PO <sup>2-</sup>            | Stretching vibrations in carbohydrates and stretching vibrations of phosphate group                     |
| 1039             | C-O                                 | Stretching vibrations of C-O-C of carbohydrates                                                         |

---



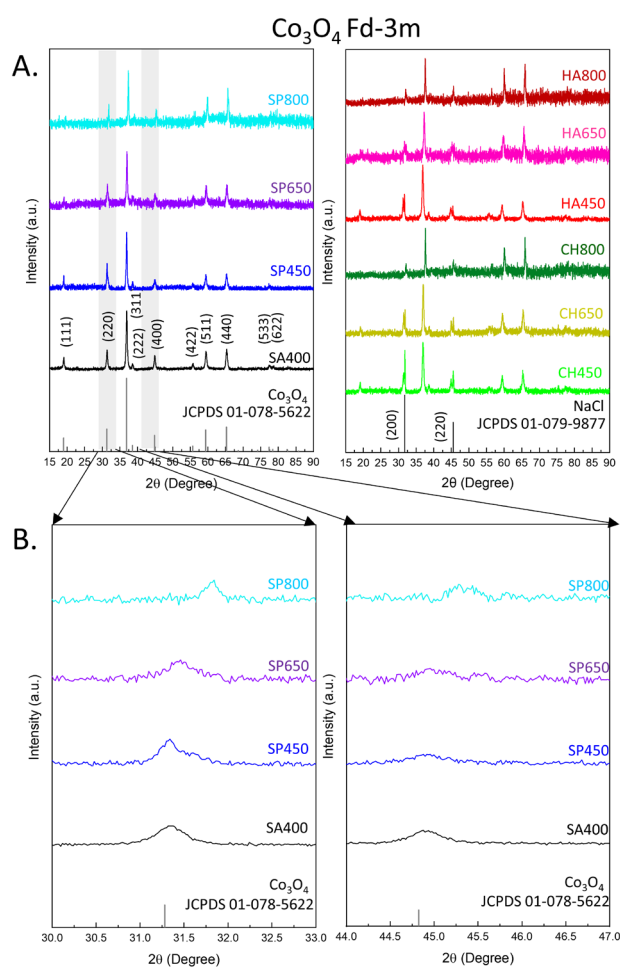

**Figure S3** XRD analysis of  $\text{Co}_3\text{O}_4$  NMs: (A) wide angle, (B) selected magnified angle regions.

**Table S8** D-spacing values of SA400  $\text{Co}_3\text{O}_4$  NMs.

| SA400              |                                 |                             |
|--------------------|---------------------------------|-----------------------------|
| Miller index (hkl) | Peak pos. [ $^{\circ}2\theta$ ] | d- Spacing [ $\text{\AA}$ ] |
| (111)              | 19.067                          | 4.651                       |
| (220)              | 31.400                          | 2.847                       |
| (311)              | 36.915                          | 2.433                       |
| (400)              | 44.876                          | 2.018                       |
| (511)              | 59.435                          | 1.554                       |
| (440)              | 65.310                          | 1.428                       |

**Table S9** D-spacing values for SP450, SP650, and SP800 Co<sub>3</sub>O<sub>4</sub> NMs.

| SP450              |                  |                | SP650            |                | SP800            |                |
|--------------------|------------------|----------------|------------------|----------------|------------------|----------------|
| Miller index (hkl) | Peak pos. [°2Th] | d- Spacing [Å] | Peak pos. [°2Th] | d- Spacing [Å] | Peak pos. [°2Th] | d- Spacing [Å] |
| (111)              | 19.088           | 4.646          | 19.108           | 4.641          | 19.449           | 4.560          |
| (220)              | 31.340           | 2.852          | 31.461           | 2.841          | 31.842           | 2.808          |
| (311)              | 36.915           | 2.433          | 36.975           | 2.429          | 37.396           | 2.403          |
| (400)              | 44.916           | 2.016          | 44.957           | 2.015          | 45.277           | 2.001          |
| (511)              | 59.415           | 1.554          | 59.495           | 1.552          | 59.816           | 1.545          |
| (440)              | 65.251           | 1.429          | 65.331           | 1.427          | 65.652           | 1.421          |

**Table S10** D-spacing values for CH450, CH650, and CH800 Co<sub>3</sub>O<sub>4</sub> NMs.

| CH450              |                  |                | CH650            |                | CH800            |                |
|--------------------|------------------|----------------|------------------|----------------|------------------|----------------|
| Miller index (hkl) | Peak pos. [°2Th] | d- Spacing [Å] | Peak pos. [°2Th] | d- Spacing [Å] | Peak pos. [°2Th] | d- Spacing [Å] |
| (111)              | 19.128           | 4.636          | 19.148           | 4.631          | -                | -              |
| (220)              | 31.420           | 2.845          | 31.421           | 2.845          | -                | -              |
| (311)              | 36.975           | 2.429          | 36.975           | 2.429          | 37.637           | 2.388          |
| (400)              | 44.936           | 2.016          | 44.937           | 2.016          | -                | -              |
| (511)              | 59.455           | 1.553          | 59.515           | 1.552          | 60.057           | 1.539          |
| (440)              | 65.290           | 1.428          | 65.351           | 1.427          | 65.932           | 1.416          |

**Table S11** D-spacing values for HA450, HA650, and HA800 Co<sub>3</sub>O<sub>4</sub> NMs.

| HA450              |                  |                | HA650            |                | HA800            |                |
|--------------------|------------------|----------------|------------------|----------------|------------------|----------------|
| Miller index (hkl) | Peak pos. [°2Th] | d- Spacing [Å] | Peak pos. [°2Th] | d- Spacing [Å] | Peak pos. [°2Th] | d- Spacing [Å] |
| (111)              | 18.927           | 4.685          | -                | -              | -                | -              |
| (220)              | 31.340           | 2.852          | 31.681           | 2.822          | -                | -              |
| (311)              | 36.895           | 2.434          | 37.256           | 2.412          | 37.557           | 2.393          |
| (400)              | 44.956           | 2.015          | 45.197           | 2.005          | -                | -              |
| (511)              | 59.395           | 1.555          | 59.776           | 1.546          | 60.017           | 1.540          |
| (440)              | 65.290           | 1.428          | 65.632           | 1.421          | 65.973           | 1.415          |

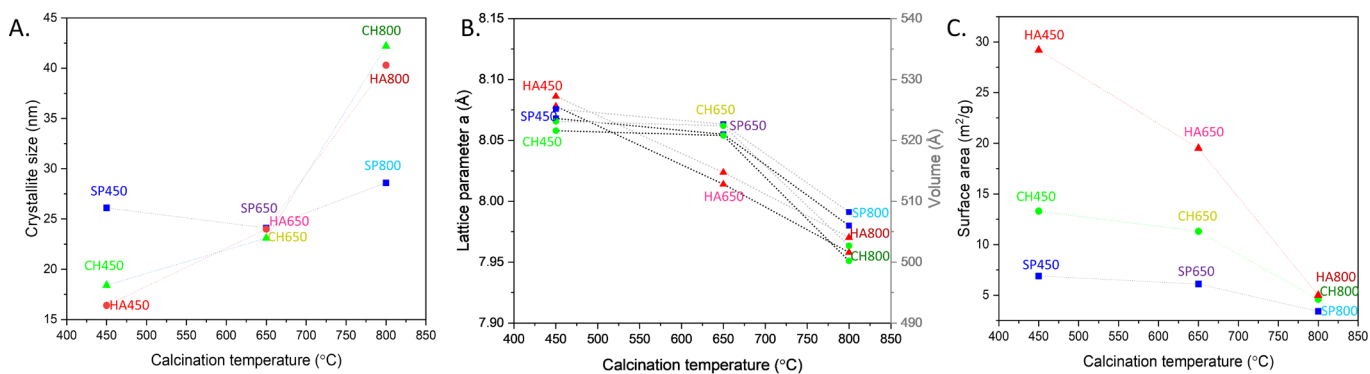

**Figure S4** Influence of calcination temperature: (A) crystallite size, (B) lattice parameter and volume, (C) surface area.

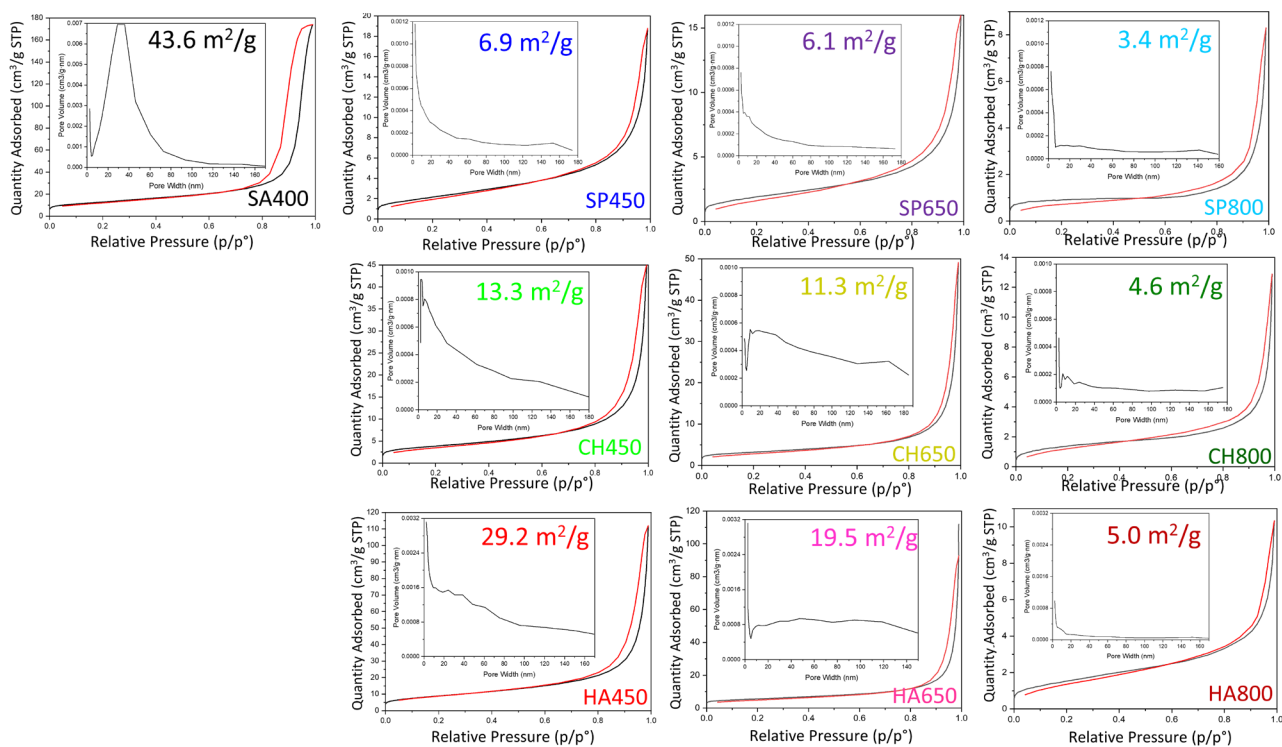

Figure S5 BET isotherms for commercial and synthesized  $\text{Co}_3\text{O}_4$  NMs.

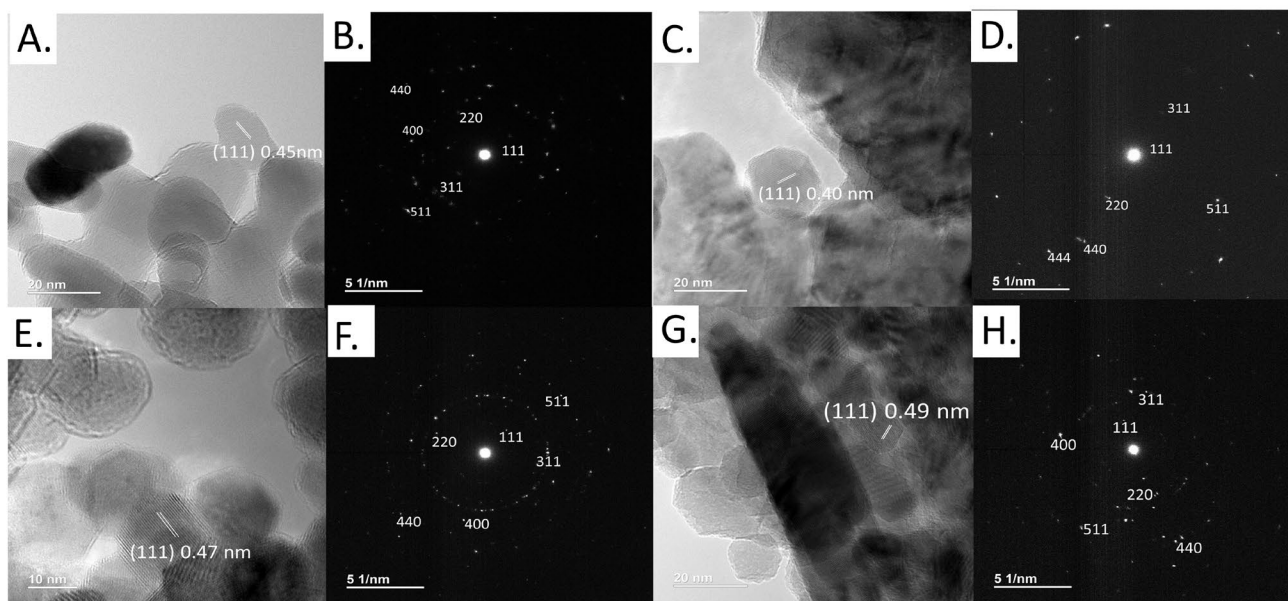

Figure S6 TEM and SAED studies of  $\text{Co}_3\text{O}_4$  NMs: (A-B) SA400, (C-D) SP450, (E-F) CH450, (G-H) HA450.

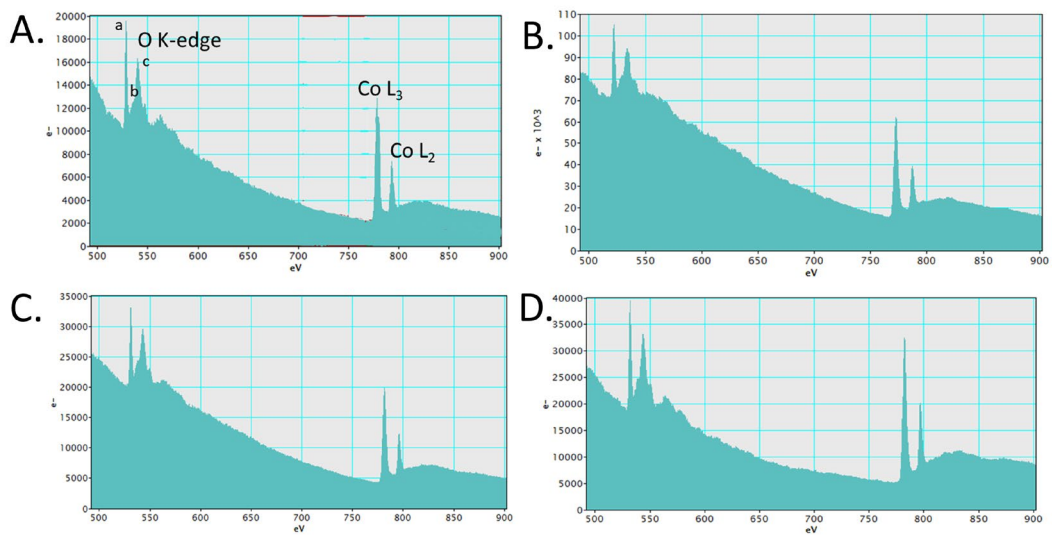

**Figure S7** Raw EELS spectra of the commercial and synthesized  $\text{Co}_3\text{O}_4$  NMs: (A) SA, (B) SP450, (C) CH450, (D) HA450.

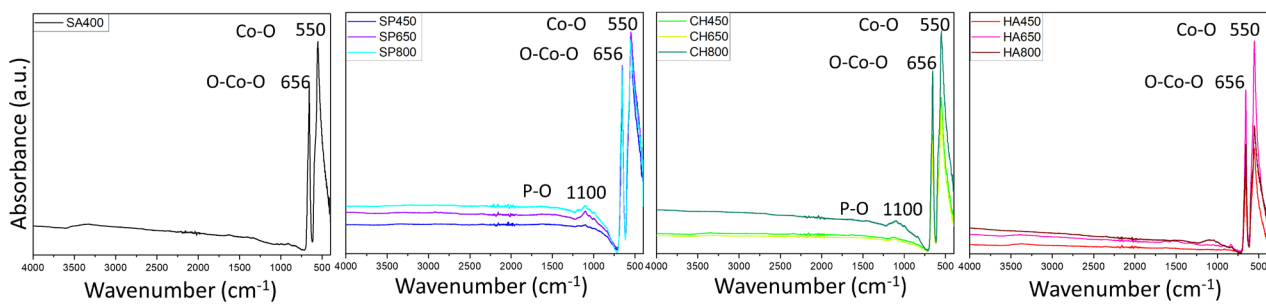

**Figure S8** UATR-FTIR spectra of  $\text{Co}_3\text{O}_4$  NMs.

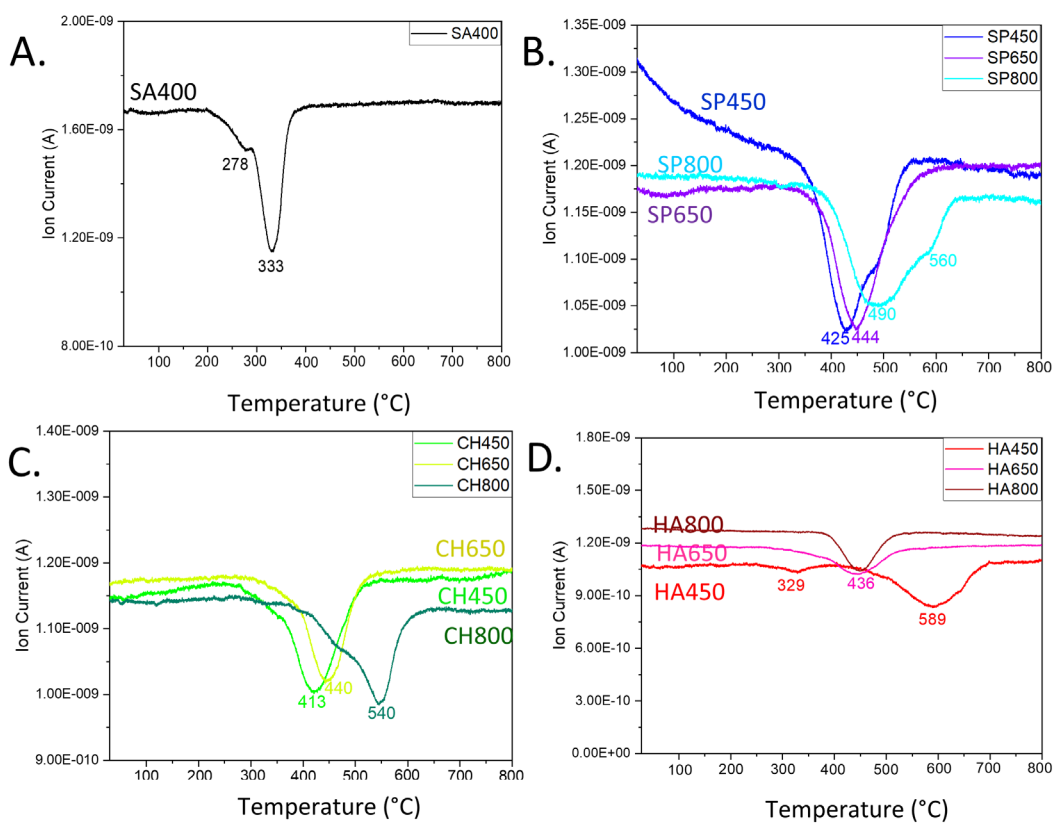

**Figure S9** H<sub>2</sub>-TPR of Co<sub>3</sub>O<sub>4</sub> NMs: (A) SP400, (B) SP450, SP650, SP800, (C) CH450, CH650, CH800, (D) HA450, HA650, HA800.

**Table S12** Detected peaks in H<sub>2</sub>-TPR and O<sub>2</sub>-TPD (°C) for Co<sub>3</sub>O<sub>4</sub> NMs.

| Sample | H <sub>2</sub> -TPR | O <sub>2</sub> -TPD     |
|--------|---------------------|-------------------------|
| SA400  | 278, 333            | 97, 205, 253, 314       |
| SP450  | 425                 | 130, 190, 272, 381, 428 |
| SP650  | 444                 | 111, 397, 481           |
| SP800  | 490, 560            | 111, 471                |
| CH450  | 413                 | 107, 203, 362, 423      |
| CH650  | 440                 | 89, 211, 293, 440       |
| CH800  | 540                 | 123, 474                |
| HA450  | 329, 589            | 105, 267                |
| HA650  | 436                 | 130, 282                |
| HA800  | 436                 | 138, 325                |

**Table S13** DSC activation energy values (J/g) for SA, SP450, CH450, and HA450 Co<sub>3</sub>O<sub>4</sub> NMs.

| Sample | 5% CO | 5% CO + 5% O <sub>2</sub> | 5% O <sub>2</sub> | 5% CO + 5% O <sub>2</sub> | 5% CO |
|--------|-------|---------------------------|-------------------|---------------------------|-------|
| SA400  | -14.4 | -12.3                     | -3.6              | -10.6                     | -6.3  |
| SP450  | -0.4  | -0.3                      | -0.2              | -0.2                      | -0.2  |
| CH450  | -2.4  | -1.3                      | -0.4              | -0.3                      | -0.3  |
| HA450  | -6.5  | -2.6                      | -1.0              | -1.0                      | -0.7  |

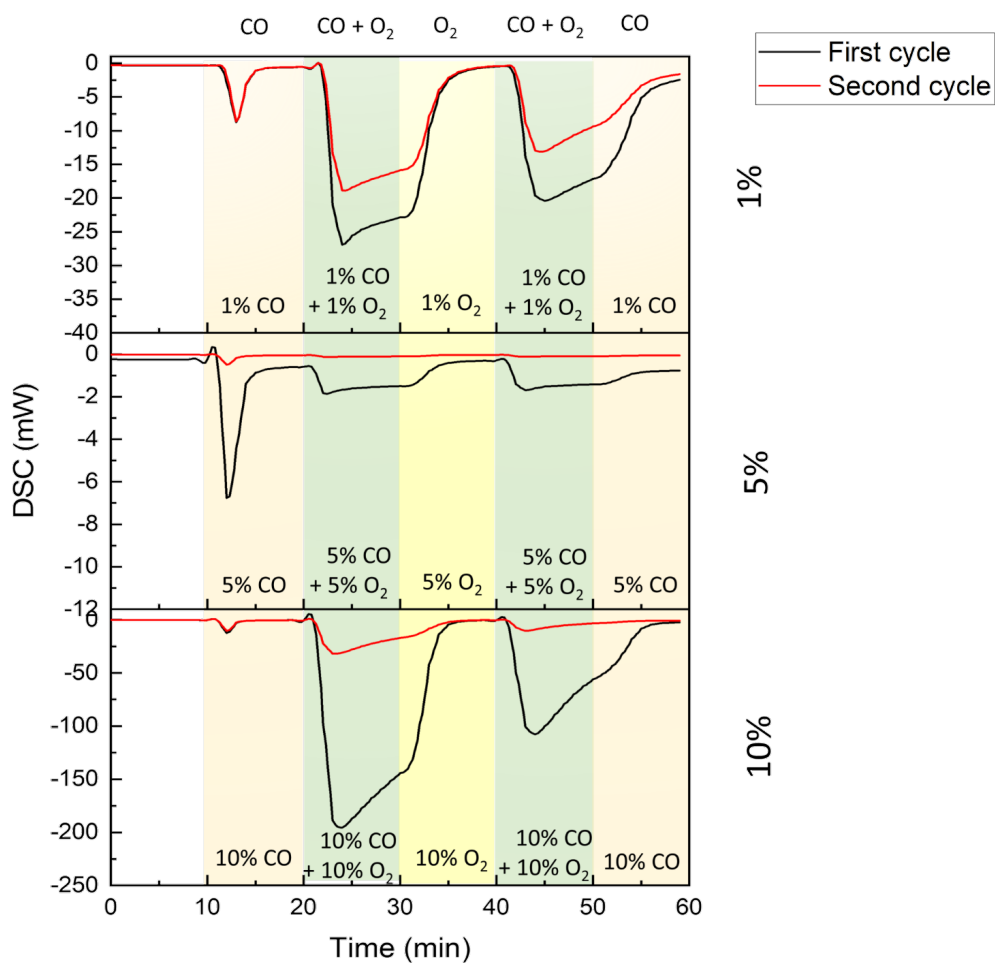

**Figure S10** DSC measurements for SA400 Co<sub>3</sub>O<sub>4</sub> NMs.

**Table S14** DCS activation energy values (J/g) for SA400 Co<sub>3</sub>O<sub>4</sub> NMs.

| Gas concentration (%) | Cycle           | CO    | CO + O <sub>2</sub> | O <sub>2</sub> | CO + O <sub>2</sub> | CO     |
|-----------------------|-----------------|-------|---------------------|----------------|---------------------|--------|
| 1                     | 1 <sup>st</sup> | -15.8 | -178.0              | -64.2          | -133.0              | -68.6  |
|                       | 2 <sup>nd</sup> | -14.8 | -120.8              | -47.5          | -80.2               | -37.7  |
| 5                     | 1 <sup>st</sup> | -14.4 | -12.3               | -3.6           | -10.6               | -6.3   |
|                       | 2 <sup>nd</sup> | -0.9  | -0.8                | -0.3           | -0.7                | -0.3   |
| 10                    | 1 <sup>st</sup> | -17.3 | -1356.8             | -338.7         | -670.7              | -194.0 |
|                       | 2 <sup>nd</sup> | -14.8 | -204.9              | -52.8          | -53.2               | -12.1  |

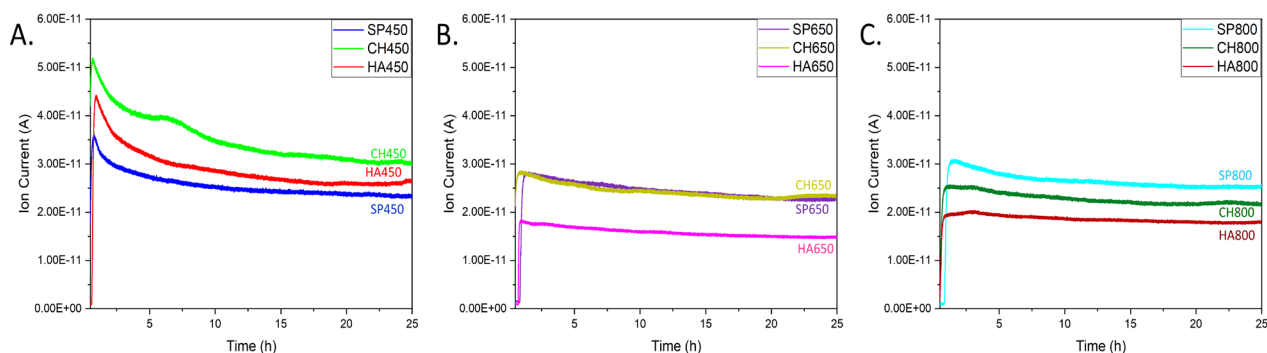

**Figure S11** CO oxidation activity comparison between Co<sub>3</sub>O<sub>4</sub> NMs calcined at different temperatures: (A) SP450, CH450, HA450, (B) SP650, CH650, HA650, (C) SP800, CH800, HA800.



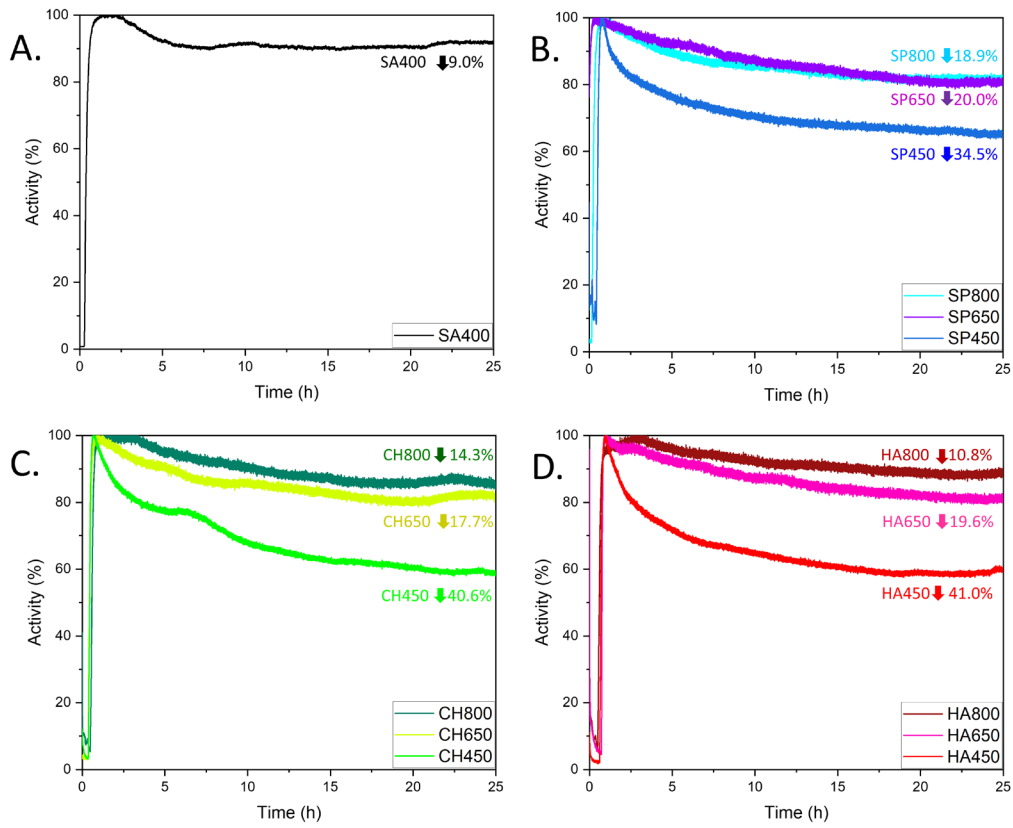

**Figure S12** CO oxidation activity decrease with time of  $\text{Co}_3\text{O}_4$  NMs: (A), SA400, (B) SP, (C) CH, (D) HA.

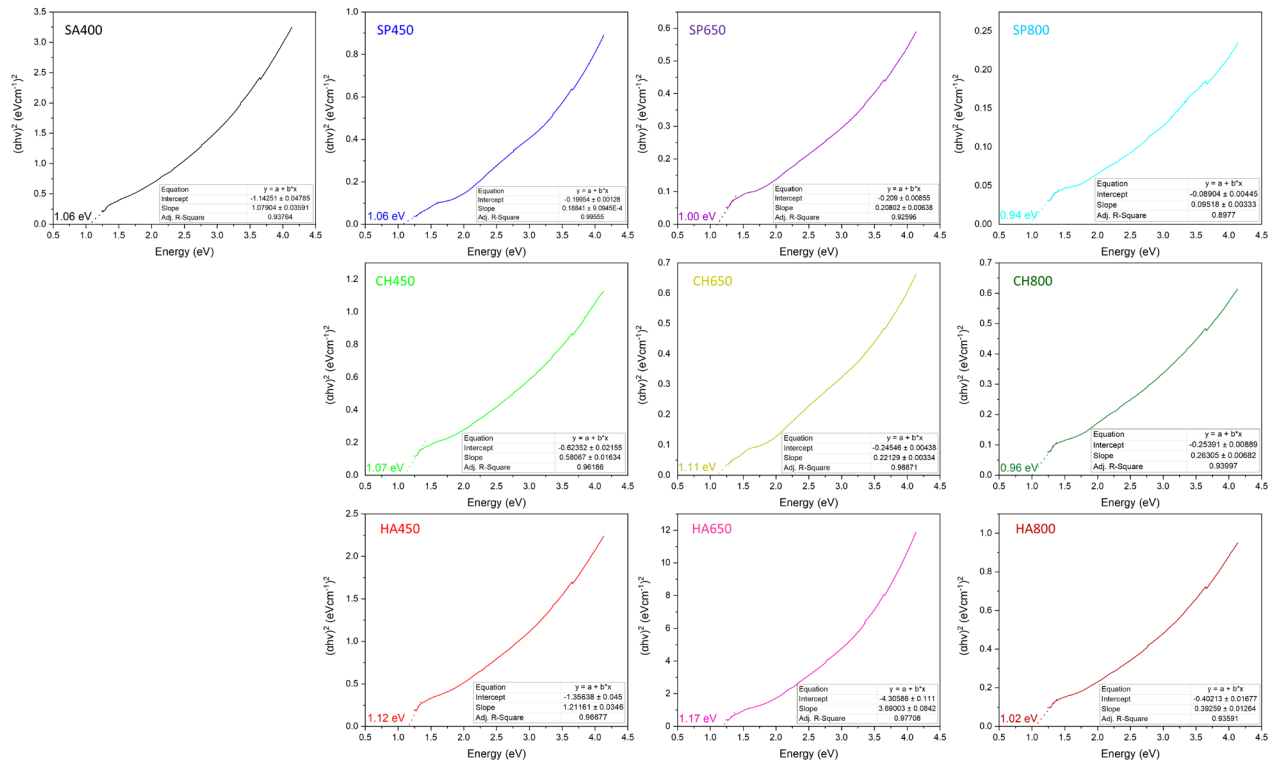

**Figure S13** Tauc plots for commercial and synthesized  $\text{Co}_3\text{O}_4$  NMs.



**Table S15** Bandgap values of Co<sub>3</sub>O<sub>4</sub> NMs.

|              | SA400 | SP450 | SP650 | SP800 | CH450 | CH650 | CH800 | HA450 | HA650 | HA800 |
|--------------|-------|-------|-------|-------|-------|-------|-------|-------|-------|-------|
| Bandgap (eV) | 1.06  | 1.06  | 1.00  | 0.94  | 1.07  | 1.11  | 0.96  | 1.12  | 1.17  | 1.02  |

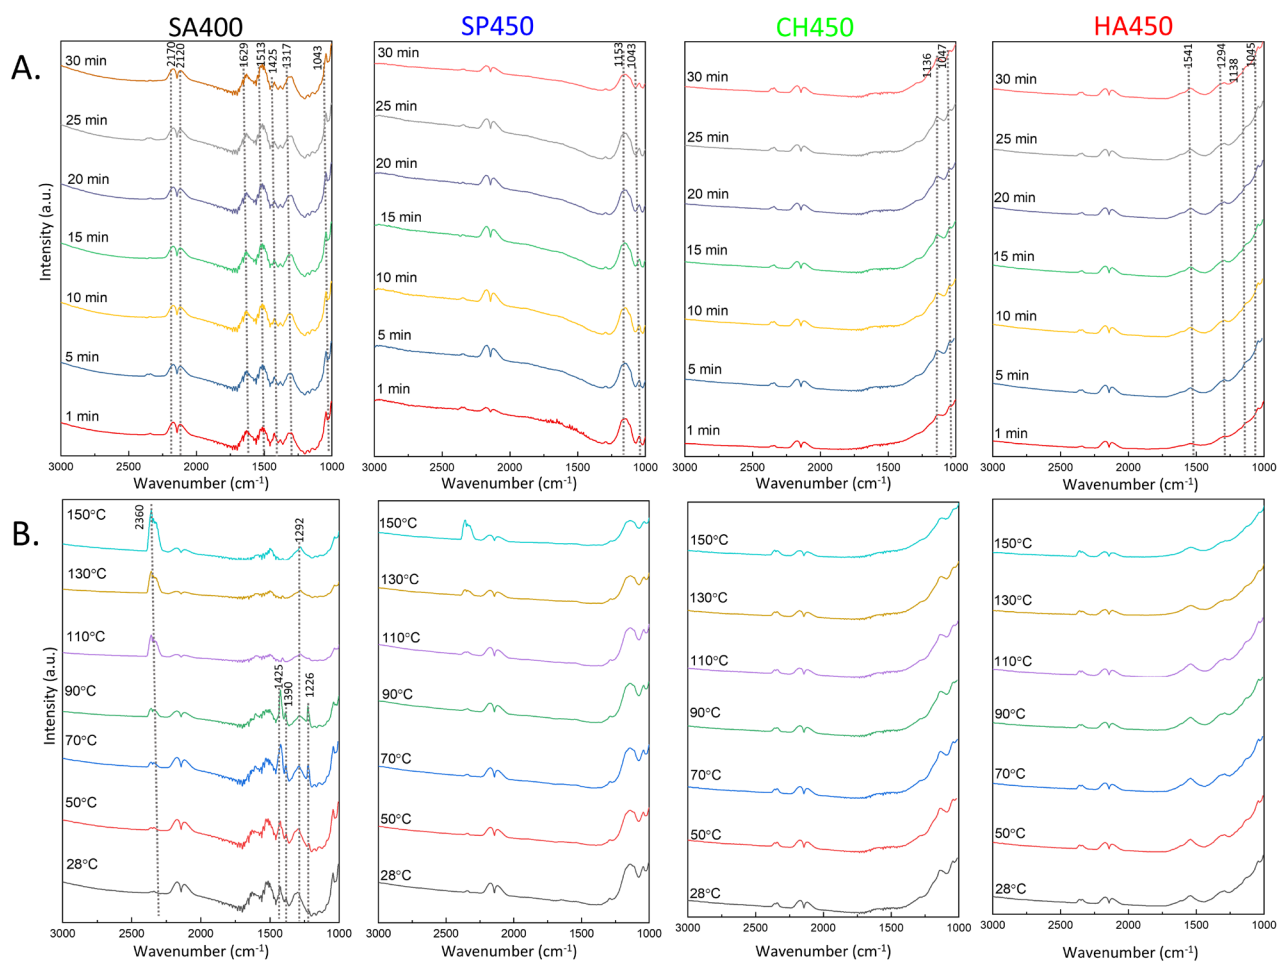

**Figure S14** DRIFTS spectra of SA400, SP450, CH450, and HA450: (A) CO oxidation activity over time (carbonate formation), (B) CO oxidation activity upon heating (carbonate stability).

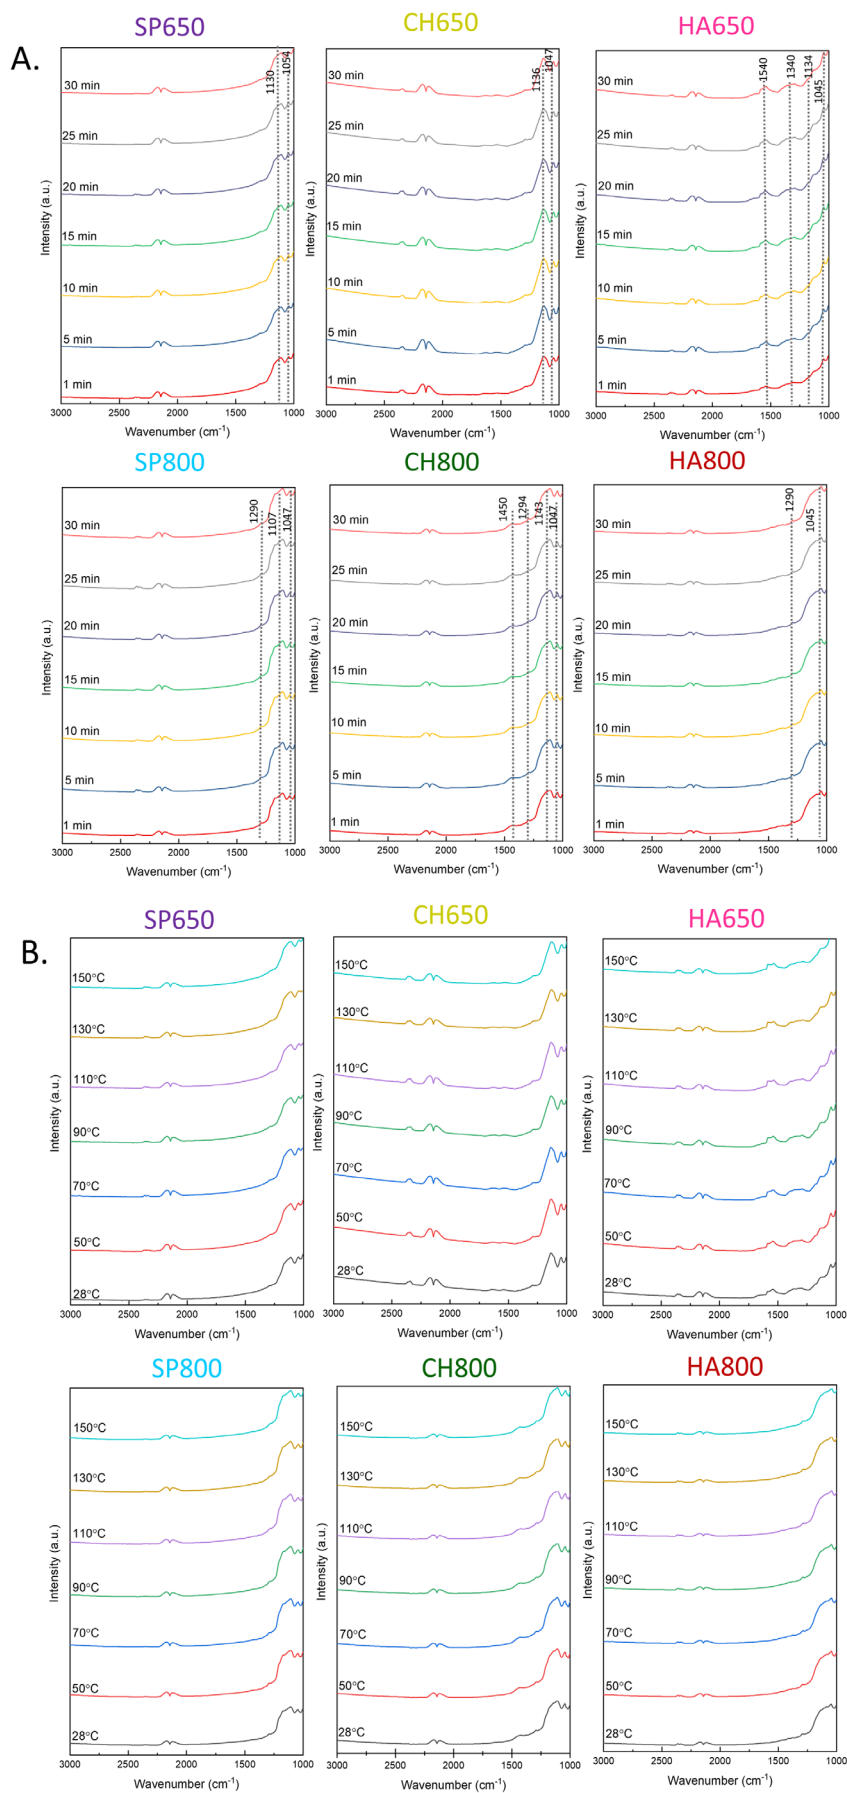

**Figure S15** DRIFTS spectra of SP650, SP800, CH650, CH800, HA450, and HA800: (A) CO oxidation activity over time (carbonate formation), (B) CO oxidation activity upon heating (carbonate stability).

## References

- 1 I. Michalak, M. Mironiuk, K. Godlewska, J. Trynda and K. Marycz, *Process Biochem.*, 2020, **88**, 129–137.
- 2 M. Mecozzi, M. Pietroletti, M. Scarpiniti, R. Acquistucci and M. E. Conti, *Environ. Monit. Assess.*, 2012, **184**, 6025–6036.
- 3 A. Poonprasartporn and K. L. A. Chan, *Biochim. Biophys. Acta - Mol. Cell Res.*, 2021, **1868**, 119024.
